# Supplementary material for: The global, regional, and national disease burden of breast cancer attributable to tobacco from 1990 to 2019: a global burden of disease study
Source: PubMed Central journal article supplement (PMC10770986; doi:10.1186/s12889-023-17405-w), 2024-01-06

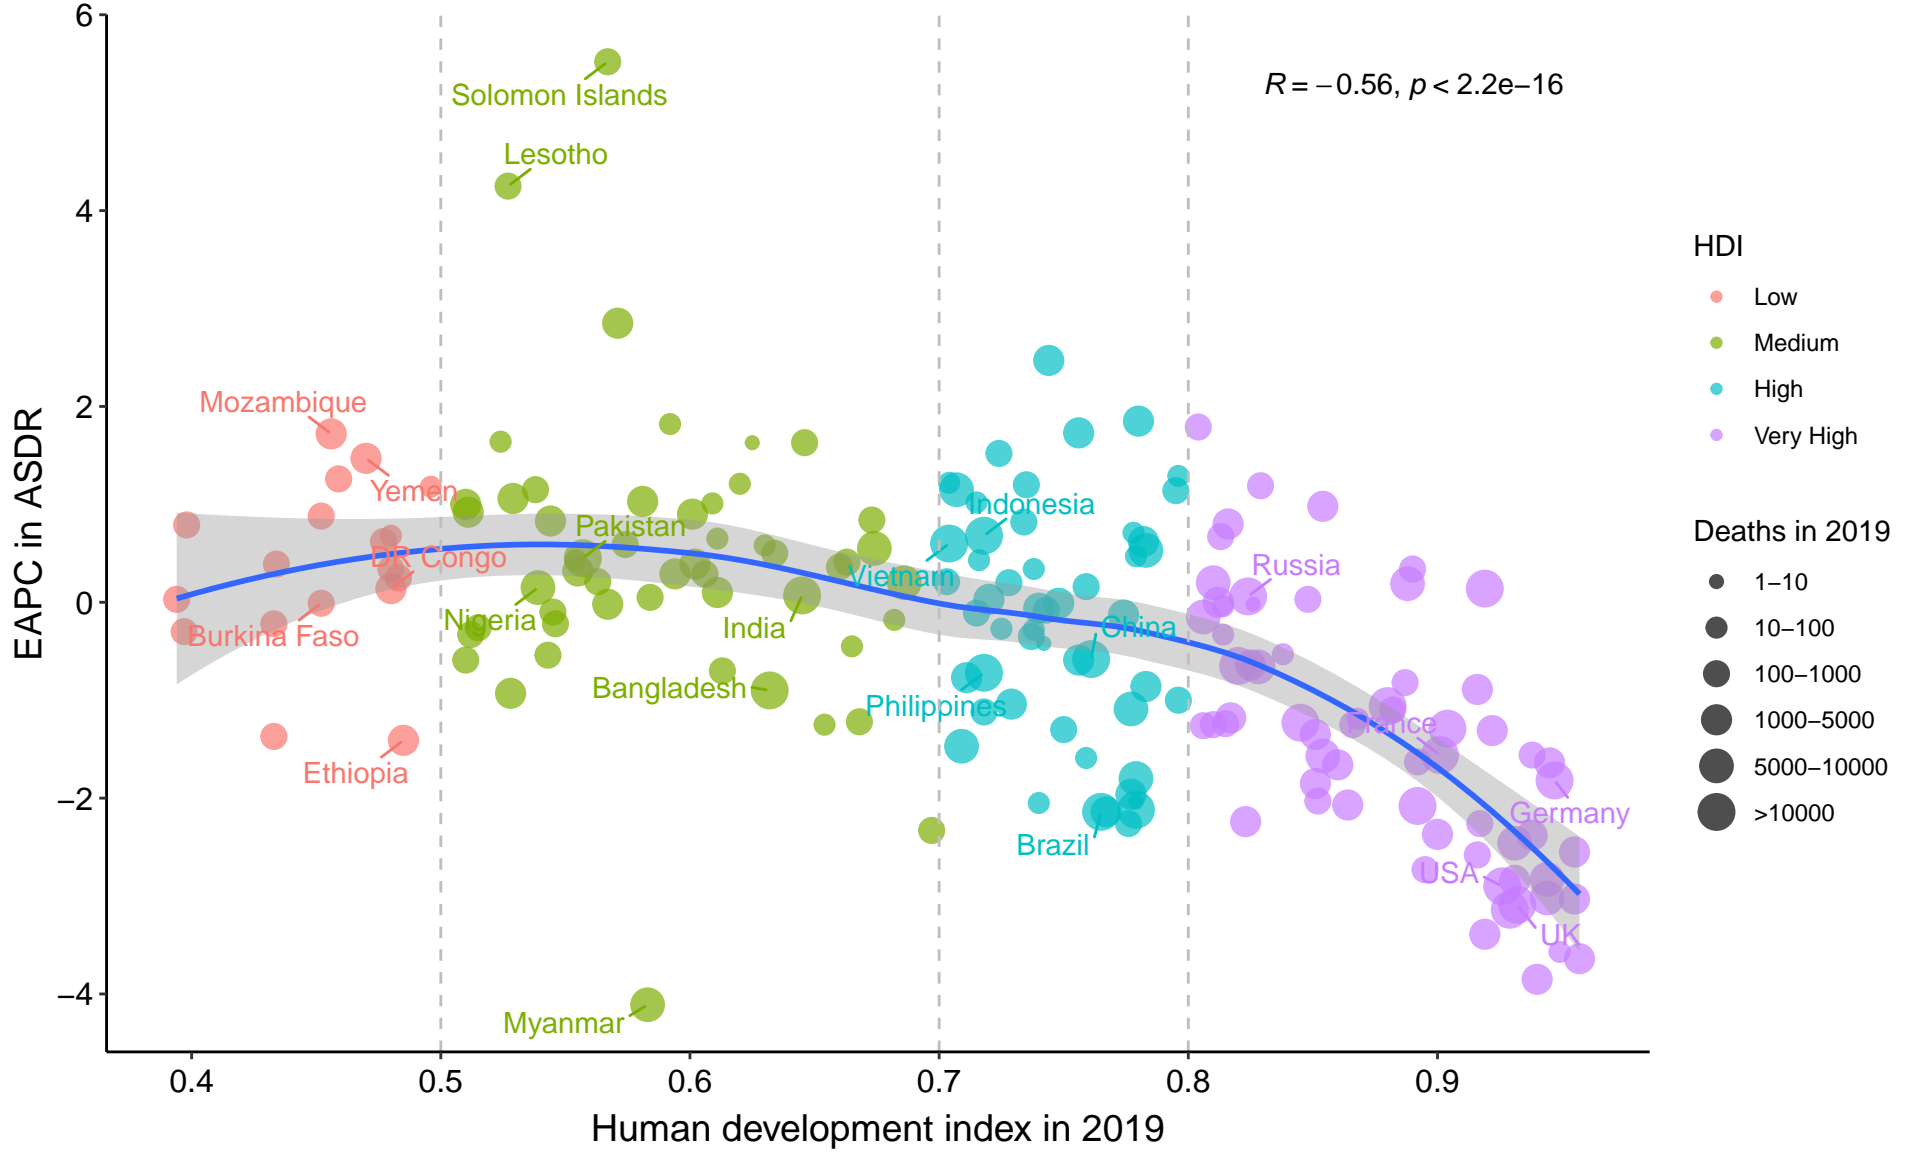

Supplement: 12889_2023_17405_MOESM4_ESM.pdf [file 12889_2023_17405_MOESM4_ESM.pdf]
